# Supplementary material for: Transcriptome analysis of the pectoral muscles of local chickens and commercial broilers using Ribo-Zero ribonucleic acid sequencing
Source: PLoS One. 2017 Sep 1;12(9):e0184115. doi: 10.1371/journal.pone.0184115 (PMC5581173; doi:10.1371/journal.pone.0184115)
Supplement: S2 Table — (XLSX) [file pone.0184115.s002.xlsx]

## Sheet: Sheet1
S2 Table. The 10 highest expression genes in muscles of AA chickens and Gushi chickens
rank in G-mix vs A	gene_id	gene_name	A_FPKM	G-mix_FPKM	A_count	G-mix_count	log2FC	Pvalue	Qvalue
1st	ENSGALG00000017926	7SK	94464.7	52713.3	537971	465071	-0.841608	0.000412541	0.00269953
2nd	ENSGALG00000014442	GAPDH	17606.7	16403.4	939909	1356598	-0.10213	0.944858	1
3rd-4th	ENSGALG00000033766	gga-mir-7474	13187.1	14108.7	17120	28376	0.0974584	0.296967	0.510465
4th-3rd	ENSGALG00000006300	-	15796.4	13646.6	497374	665673	-0.211048	0.642719	0.822584
5th	ENSGALG00000006591	TNNI2	13095.9	12942.3	194725	298132	-0.017017	0.627226	0.808887
6th-7th	ENSGALG00000006572	TNNT3	9901.95	7986.86	341603	426861	-0.310084	0.342977	0.565843
7th-9th	ENSGALG00000029606	-	6255	7884.21	736582	1438341	0.333958	0.0278539	0.0887741
8th-6th	ENSGALG00000001459	TNNC1	12229	6610.53	144156	120722	-0.887472	0.000175626	0.00128513
9th-8th	ENSGALG00000006835	TNNC2	9002.7	6327.91	113604	123706	-0.508628	0.0552504	0.151203
10th-12th	ENSGALG00000011086	-	3051	5566.51	208767	590083	0.867494	1.84657e-06	2.44612e-05
13th-10th	ENSGALG00000002907	MYL1	4674.27	4078.97	160770	217346	-0.196535	0.694478	0.859907
